# Supplementary material for: Quality indicators of continuous renal replacement therapy (CRRT) care in critically ill patients: a systematic review
Source: Springer Nature journal article supplement (doi:10.1007/s00134-016-4579-x), 2016-10-11
Supplement: MOESM5 [file 10863844]

**Supplement 5. References for Included Trials:**

1. De Vico P, Messino V, Tartaglione A, Beccaris C, Buonomo C, Talarico D, Prati P, Sabato AF, Colella DF, (2015) Safety and Efficacy of Citrate Anti-Coagulation Continuous Renal Replacement Therapies in Post-Cardiac Surgery Patients With Liver Dysfunction. Ther Apher Dial

2. Goonasekera CD, Wang J, Bunchman TE, Deep A, (2015) Factors affecting circuit life during continuous renal replacement therapy in children with liver failure. Ther Apher Dial 19: 16-22

3. Kee YK, Kim YL, Kim EJ, Park JT, Han SH, Yoo TH, Kang SW, Choi KH, Oh HJ, (2014) The effect for specialized continuous renal replacement therapy team in acute kidney injury patients. Nephrology Dialysis Transplantation 29: iii358

4. Schilder L, Nurmohamed SA, Bosch FH, Purmer IM, den Boer SS, Kleppe CG, Vervloet MG, Beishuizen A, Girbes AR, Ter Wee PM, Groeneveld AB, group Cs, (2014) Citrate anticoagulation versus systemic heparinisation in continuous venovenous hemofiltration in critically ill patients with acute kidney injury: a multi-center randomized clinical trial. Critical Care 18

5. Claure-Del Granado R, Macedo E, Soroko S, Kim Y, Chertow GM, Himmelfarb J, Ikizler TA, Paganini EP, Mehta RL, (2014) Anticoagulation, delivered dose and outcomes in CRRT: The program to improve care in acute renal disease (PICARD). Hemodialysis International 18: 641-649

6. Treschan TA, Schaefer MS, Geib J, Bahlmann A, Brezina T, Werner P, Golla E, Greinacher A, Pannen B, Kindgen-Milles D, Kienbaum P, Beiderlinden M, (2014) Argatroban versus Lepirudin in critically ill patients (ALicia): a randomized controlled trial. Crit Care 18: 588

7. Fernandez SN, Santiago MJ, Lopez-Herce J, Garcia M, Del Castillo J, Alcaraz AJ, Bellon JM, (2014) Citrate anticoagulation for CRRT in children: comparison with heparin. BioMed Research International 786301

8. Lipcsey M, Chua HR, Schneider AG, Robbins R, Bellomo R, (2014) Clinically manifest thromboembolic complications of femoral vein catheterization for continuous renal replacement therapy. Journal of Critical Care 29: 18-23

9. Chua HR, Schneider AG, Sherry NL, Lotfy N, Chan MJ, Galtieri J, Wong GR, Lipcsey M, Matte Cde A, Collins A, Garcia-Alvarez M, Bellomo R, (2014) Initial and extended use of femoral versus nonfemoral double-lumen vascular catheters and catheter-related infection during continuous renal replacement therapy. American Journal of Kidney Diseases 64: 909-917

10. Dunn WJ, Sriram S, (2014) Filter lifespan in critically ill adults receiving continuous renal replacement therapy: the effect of patient and treatment-related variables. Critical Care & Resuscitation 16: 225-231

11. Ho KM, Morgan DJ, (2014) Patient factors associated with frequent clotting of dialysers during haemodiafiltration in critically ill patients: a post hoc analysis of a randomised controlled study. Anaesthesia & Intensive Care 42: 59-64

12. Crosswell A, Brain MJ, Roodenburg O, (2014) Vascular access site influences circuit life in continuous renal replacement therapy. Critical Care & Resuscitation 16: 127-130

13. Lee YK, Lee HW, Choi KH, Kim BS, (2014) Ability of Nafamostat Mesilate to Prolong Filter Patency during Continuous Renal Replacement Therapy in Patients at High Risk of Bleeding: A Randomized Controlled Study. PLoS ONE 9: e108737

14. Prada Rico M, Fernandez Sarmiento J, Gastelbondo Amaya R, González Chaparro L, (2014) ABSTRACT 190: Regional Citrate Anticoagulation for Continuous Renal Replacement Therapy in Critically Ill Children. Pediatric Critical Care Medicine 15: 46-47

15. Fischer F, Putignano A, Willars C, Wendon J, Harris S, Auzinger G, (2014) Impact of ideal versus estimated body weight on haemofiltration dosing in critically ill patients with AKI. Critical Care 18: P404-P404

16. Chenouard A, Allain-Launay E, Joram N, (2014) Regional citrate anticoagulation versus heparin anticoagulation in pediatric continuous renal replacement therapy. Pediatric Critical Care Medicine 1): 54

17. Campbell VK, Guitterez D, Anstey C, Ostwald M, (2014)A Regional Intensive Care Unit Transition From Heparin to Citatre Anticoagulation as First-line Safety, Filter Down-Time and Cost Saving American Society of Nephrology Kidney Week (2014) Abstract Supplement. J Am Soc Nephr 25:587

18. Han MJ, Kim CR, Kim DH, kim SH, (2014) American Society of Nephrology Kidney Week (2014) Abstract Supplement. J Am Soc Nephr 25:587

19. Mottes T, Owens T, Niedner M, Juno J, Shanley TP, Heung M, (2013) Improving delivery of continuous renal replacement therapy: impact of a simulation-based educational intervention. Pediatr Crit Care Med 14: 747-754

20. Goonasekera C, Wang J, Taylor S, Sajadah S, Deep A, (2013) Continuous veno-venous hemofiltration (CVVH) and circuit life in children with acute liver failure. Critical Care Medicine 1): A252

21. Leung AK, Shum HP, Chan KC, Chan SC, Lai KY, Yan WW, (2013) A retrospective review of the use of regional citrate anticoagulation in continuous venovenous hemofiltration for critically ill patients. Critical Care Research & Practice 349512

22. Fealy N, Kim I, Baldwin I, Schneider A, Bellomo R, (2013) A comparison of the Niagara and Medcomp catheters for continuous renal replacement therapy. Renal Failure 35: 308-313

23. Kalb R, Kram R, Morgera S, Slowinski T, Kindgen-Milles D, (2013) Regional citrate anticoagulation for high volume continuous venovenous hemodialysis in surgical patients with high bleeding risk. Therapeutic Apheresis & Dialysis: Official Peer Reviewed Journal of the International Society for Apheresis, the Japanese Society for Apheresis, the Japanese Society for Dialysis Therapy 17: 202-212

24. Jacobs R, Honore PM, De Regt J, De Waele E, Lochy S, Troubleyn J, Diltoer M, Spapen H, (2013) Type of citrate solution and filter lifespan during continuous renal replacement therapy. Intensive Care Medicine 39: S442-S443

25. Richardson C, Tunnicliffe B, (2013) Do intensive care patients requiring renal replacement therapy receive an adequate delivered dose? a tertiary centre experience. Intensive Care Medicine 39: S320

26. Jacobs R, Honore PM, De Regt J, De Waele E, Lochy S, Troubleyn J, Diltoer M, Spapen H, (2013) Type of Citrate Solution and Filter Lifespan During Continuous Renal Replacement Therapy. Intensive Care Medicine 29: S442-443

27. Gojaseni P, Wongpornpakdee K, Kamjai P, Pajareya T, Chittinandana A, (2013) Factors associated in premature circuit clotting in continuous venovenous hemofiltration. Blood Purification 34: 274

28. Ferraresi M, Merlo I, Giovinazzo G, Querci AD, Leonardi G, Anania P, Guarena C, Cantaluppi V, Pacitti A, Blancone L (2013) Comparison of Circuit Coagulation After and Before Application of an Anti-clotting Flow Chart: A Retrospective Monocentric Analysis presented at 50th Congress of the European Renal Association and European Dialysis and Transplant Association 2013.

29. Dalhuisen A, Katinakis PA, Steenbergen H, Kamphuis S, Sprong PE, (2013) CVVHD is Safe and Cheapter than Standard CVVH During Extracorporeal Citrate Coagulation in ICU Patients with AKI, Intensive Care Medicine 39: S442

30. Avila R, Romero E, Carrizo N, Fuentes J, Cordini V, Bongiorni G, (2013) Regional Citrate Anticoagulation for Continuous Venovenous Hemofiltration and Hemodiafiltration Using Lactate as Buffer and Calcium-containing Dialysate and Fluid: Experience in 21 Patients, Intensive Care Medicine 39: S320-321

31. American Society of Nephrology Kidney Week (2013) Abstract Supplement. J Am Soc Nephr 25:346

32. Lyndon WD, Wille KM, Tolwani AJ, (2012) Solute clearance in CRRT: prescribed dose versus actual delivered dose. Nephrology Dialysis Transplantation 27: 952-956

33. Claure-Del Granado R, Macedo E, Chertow GM, Soroko S, Himmelfarb J, Ikizler TA, Paganini EP, Mehta RL, (2012) Toward the optimal dose metric in continuous renal replacement therapy. International Journal of Artificial Organs 35: 413-424

34. Chua HR, Baldwin I, Bailey M, Subramaniam A, Bellomo R, (2012) Circuit lifespan during continuous renal replacement therapy for combined liver and kidney failure. Journal of Critical Care 27

35. Zhang Z, Ni H, Lu B, (2012) Variables associated with circuit life span in critically ill patients undergoing continuous renal replacement therapy: a prospective observational study. ASAIO Journal 58: 46-50

36. Lipcsey M, Chua HR, Schneider AG, Bellomo R, (2012) The safety of femoral vein insertion of CRRT dialysis catheters. Intensive Care Medicine 38: S262

37. Ezihe-Ejiofor JA, Corner A, (2012) An Audit of the Effectiveness of Renal Replacement Therapy in the Adult Intensive Care Unit. Anaesthesia 67: 44

38. Conception L, (2012) Acute Kidney Injury Requiring Dialysis: Use of Shift CVVHD. Hemodialysis Internation 16(1): 134

39. Claure-Del Granado R, Macedo E, Chertow GM, Soroko S, Himmelfarb J, Ikizler TA, Paganini EP, Mehta RL, (2011) Effluent volume in continuous renal replacement therapy overestimates the delivered dose of dialysis. Clinical Journal of the American Society of Nephrology 6: 467-475

40. Kim I, Fealy N, Baldwin I, Bellomo R, (2011) A comparison of the Niagara and Dolphin catheters for continuous renal replacement therapy. International Journal of Artificial Organs 34: 1061-1066

41. Kim IB, Fealy N, Baldwin I, Bellomo R, (2011) Insertion side, body position and circuit life during continuous renal replacement therapy with femoral vein access. Blood Purification 31: 42-46

42. Tan CS, Tan HK, Choong HL, (2011) Real-time circuit pressures correlate poorly with circuit longevity in anticoagulant-free, predilution continuous venovenous hemofiltration. Blood Purification 32: 15-20

43. Steen J, Schell-Chaple H, (2011) Identifying improvement opportunities through quality and safety monitoring of continuous renal replacement therapy (CRRT) practice. Critical Care Medicine 39: 181

44. Saha S, Shah P, Gibbs J, Collins J, (2011) Effect of site of haemofilter catheter on the duration of haemofilter circuit. Intensive Care Medicine 37: S129

45. Kalb R, Ammann J, Slowinski T, Morgera S, Kindgen-Milles D, (2011) Regional citrate anticoagulation in high-volume continuous venovenous hemodialysis. Critical Care 15: S46

46. Choi JS, Yang WS, Kim SB, Park SK, Lee SK, Park JS, Chang JW, (2011) In spite of positive charge on polyethyleneimine, an69 st membrane does not tightly adsorb heparin during continuous renal replacement therapy. International Journal of Artificial Organs 34 (8): 626-627

47. Baldwin I, Fealy N, Carty P, Byung KI, Boyle M, (2011) A comparison of two extracorporeal CRRT circuit bubble trap chambers: Vertical versus horizontal blood entry. Australian Critical Care 24: 61-61

48. Parienti JJ, Megarbane B, Fischer MO, Lautrette A, Gazui N, Marin N, Hanouz JL, Ramakers M, Daubin C, Mira JP, Charbonneau P, du Cheyron D, Cathedia Study G, (2010) Catheter dysfunction and dialysis performance according to vascular access among 736 critically ill adults requiring renal replacement therapy: a randomized controlled study. Critical Care Medicine 38: 1118-1125

49. Parienti JJ, Dugue AE, Daurel C, Mira JP, Megarbane B, Mermel LA, Daubin C, du Cheyron D, Members of the Cathedia Study G, (2010) Continuous renal replacement therapy may increase the risk of catheter infection. Clinical Journal of The American Society of Nephrology: CJASN 5: 1489-1496

50. Garces EO, Victorino JA, Thome FS, Rohsig LM, Dornelles E, Louzada M, Stifft J, de Holanda F, Veronese FV, (2010) Enoxaparin versus unfractioned heparin as anticoagulant for continuous venovenous hemodialysis: a randomized open-label trial. Renal Failure 32: 320-327

51. Kim IB, Fealy N, Baldwin I, Bellomo R, (2010) Premature circuit clotting due to likely mechanical failure during continuous renal replacement therapy. Blood Purification 30: 79-83

52. Fabbri LP, Nucera M, Al Malyan M, Becchi C, (2010) Regional anticoagulation and antiaggregation for CVVH in critically ill patients: a prospective, randomized, controlled pilot study. Acta Anaesthesiologica Scandinavica 54: 92-97

53. Ooi EL, Lim TW, Lim N, (2010) Comparison of the efficacy and safety of two regional citrate anticoagulation protocols using acid citrate dextrose A or Prismocitrate 10/2, in patients with acute renal failure undergoing continuous venovenous haemodiafiltration. Critical Care 14: S173

54. Kleger GR, Fassler E, (2010) Can circuit lifetime be a quality indicator in continuous renal replacement therapy in the critically ill? International Journal of Artificial Organs 33: 139-146

55. Hackbarth R, Eding D, Bunchman TE, (2010) A retrospective review of prescribed versus delivered CRRT dose in children: How close do we come to our set goals? Pediatric Nephrology 25 (8): 1586-1587

56. Guillermo RD, Gustavo G, Federico V, Soledad C, Sergio G, Eduardo SR, Salomon A, (2010) Monitoring of dialysis dose in acute kidney injury with the use of KT determinated by ionic dialisance. Blood Purification 30 (3): 228-229

57. Casino FG, Morabito S, Pistolesi V, Cibelli L, Tritapepe L, Schievenin MG, Di Carlo M, Adduci D, Lopez T, (2010) Refining the assessment of dialysis dose in CRRT. NDT Plus 3: iii462-iii463

58. Bentson M, Pomarico C, Hughson E, Somers MJG, (2010) Circuit longevity in pediatric CRRT. Pediatric Nephrology 25 (8): 1585

59. Kiser T, MacLaren R, Fish D, Hassell K, Teitelbaum I, (2009) Evaluation of predictive factors associated with hemofilter survival in patients receiving heparin or bivalirudin during continuous renal replacement therapy. Critical Care Medicine 37 (12 SUPPL.): A199

60. Vesoni S, Cruz DN, Fumagalli R, Kingden-Milles D, Monti G, Marinho A, Mariano F, Formica M, Marchesi M, Rene R, Livigni S, Ronco R, (2009) Delivered Dose of Renal Replacement Therapy and Mortality in Critically Ill Patients with Acute Kidney Injury, Crit Care 13(2): R57

61. Burry LD, Tung DD, Hallett D, Bailie T, Carvalhana V, Lee D, Ramganesh S, Richardson R, Mehta S, Lapinsky SE, (2009) Regional citrate anticoagulation for PrismaFlex continuous renal replacement therapy. Annals of Pharmacotherapy 43: 1419-1425

62. Van Gemeren CW, Van Schilfgaarde M, Molenaar PJ, Leyte A, Wester JPJ, Oudemans-Van Straaten HM, (2009) Role of coagulation, anticoagulation and severity of organ failure in circuit clotting during continuous venovenous hemofiltration (CVVH). Intensive Care Medicine 35: S43

63. Shidham G, Hixon-Vermillion B, Mount K, Parrish J, (2009) Use of Anticoagulant Citrate Dextrose (ACD) as regional anticoagulation in CRRT is effective, improves filter life and decreases treatment cost. Blood Purification 27 (3): 291

64. Sachdeva KS, Podoll AS, Finkel KW, Dang T, Gupta V, (2009) Hemofilter clotting in CRRT: Evaluating factors and new techniques to improve hemofilter survival. Blood Purification 27 (3): 288

65. Qui H, Liu S, (2009) Anticoagulation of Continuous Renal Replacement Therapy in the Critically Ill Patient: Clinical Trial Comparing Normal Saline Washing, Unfractionated Heparin and Low Molecular Weight Heparin presented at the European Society of Intensive Care Medicine Annual Congress 2009

66. Chang JW, Lee HK, Yang WS, Kim SB, Park SK, Lee SK, Park JS, (2009) No difference in clearance and survival between continuous hemofiltration and hemodiafiltration at the same net effluent in patients with acute renal failure. Critical Care Medicine 37 (12 SUPPL.): A473

67. Beitland S, Moen H, Os I, (2009) Duration of time spent off therapy during continuous renal replacement therapy in trauma patients with acute renal failure. Intensive Care Medicine 35: S44

68. Durao MS, Monte JC, Batista MC, Oliveira M, Iizuka IJ, Santos BF, Pereira VG, Cendoroglo M, Santos OF, (2008) The use of regional citrate anticoagulation for continuous venovenous hemodiafiltration in acute kidney injury. Critical Care Medicine 36: 3024-3029

69. Lanquetot H, Leprince T, Ragot S, Boinot C, Jayle C, Robert R, Macchi L, (2008) Antithrombin level and circuit thrombosis during hemofiltration after cardiopulmonary bypass. Intensive Care Medicine 34: 2068-2075

70. Olert AG, Sánchez AIH, Andujar FJM, Carmona JC, Bernal AD, Nieto EC, (2008) Experience with continuous renal replacement therapy in intensive care. Factors determining the duration of the haemofilter [Spanish]. Revista de la Sociedad Española de Enfermería Nefrológica 11: 11-16

71. Davies HT, Leslie G, Pereira SM, Webb SA, (2008) A randomized comparative crossover study to assess the affect on circuit life of varying pre-dilution volume associated with CVVH and CVVHDF. International Journal of Artificial Organs 31: 221-227

72. Elderkin T, (2008) An audit of anticoagulation algorithms for renal replacement therapy. Australian Critical Care 21: 60-61

73. Boswell C, (2008) Using citrate as an anticoagulant during Continuous Renal Replacement Therapy (CRRT). Critical Care Nurse 28: e19-e19

74. Nurmohamed SA, Vervloet MG, Girbes AR, Ter Wee PM, Groeneveld AB, (2007) Continuous venovenous hemofiltration with or without predilution regional citrate anticoagulation: a prospective study. Blood Purification 25: 316-323

75. Cubattoli L, Teruzzi M, Cormio M, Lampati L, Pesenti A, (2007) Citrate anticoagulation during CVVH in high risk bleeding patients. International Journal of Artificial Organs 30: 244-252

76. Joannidis M, Kountchev J, Rauchenzauner M, Schusterschitz N, Ulmer H, Mayr A, Bellmann R, (2007) Enoxaparin vs. unfractionated heparin for anticoagulation during continuous veno-venous hemofiltration: a randomized controlled crossover study. Intensive Care Medicine 33: 1571-1579

77. Birnbaum J, Spies CD, Klotz E, Hein OV, Morgera S, Schink T, Ziemer S, Grund MS, Saalmann R, Kox WJ, Lehmann C, (2007) Iloprost for additional anticoagulation in continuous renal replacement therapy--a pilot study. Renal Failure 29: 271-277

78. Nurmohamed SA, Vervloet MG, Girbes AR, Ter Wee PM, Groeneveld AB, (2007) Continuos Venovenous Hemofiltration With or Without Predilution Regional Citrate Anticoagulation: A Prospective Study. Blood Purification 25(4): 316-25

79. Monti G, Herrera M, Kindgen-Milles D, Marinho A, Cruz D, Mariano F, Gigliola G, Moretti E, Alessandri E, Robert R, Ronco C (2007) The DOse REsponse Multicentre International collaborative initiative (DO-RE-MI). In: Ronco C, Kellum JA, Bellomo R (eds) Acute Kidney Injury. S. Karger AG, pp. 434-443

80. Hackbarth R, Bunchman TE, Chua AN, Somers MJ, Baum MA, Symons JM, Brophy PD, Blowey D, Fortenberry JD, Chand D, Flores FX, Alexander SR, Mahan JD, McBryde KD, Benfield MR, Goldstein SL, (2007) The effect of vascular access location and size on circuit survival in pediatric continuous renal replacement therapy: A report from the PPCRRT registry. International Journal of Artificial Organs 30: 1116-1121

81. Betjes MG, van Oosterom D, van Agteren M, van de Wetering J, (2007) Regional citrate versus heparin anticoagulation during venovenous hemofiltration in patients at low risk for bleeding: similar hemofilter survival but significantly less bleeding. Journal of Nephrology 20: 602-608

82. de Pont AC, Bouman CS, Bakhtiari K, Schaap MC, Nieuwland R, Sturk A, Hutten BA, de Jonge E, Vroom MB, Meijers JC, Buller HR, (2006) Predilution versus postdilution during continuous venovenous hemofiltration: a comparison of circuit thrombogenesis. ASAIO Journal 52: 416-422

83. Bihorac A, Ross EA, (2005) Continuous venovenous hemofiltration with citrate-based replacement fluid: efficacy, safety, and impact on nutrition. American Journal of Kidney Diseases 46: 908-918

84. Bagshaw SM, Laupland KB, Boiteau PJ, Godinez-Luna T, (2005) Is regional citrate superior to systemic heparin anticoagulation for continuous renal replacement therapy? A prospective observational study in an adult regional critical care system. Journal of Critical Care 20: 155-161

85. Kutsogiannis DJ, Gibney RT, Stollery D, Gao J, (2005) Regional citrate versus systemic heparin anticoagulation for continuous renal replacement in critically ill patients. Kidney International 67: 2361-2367

86. Egi M, Naka T, Bellomo R, Cole L, French C, Trethewy C, Wan L, Langenberg CC, Fealy N, Baldwin I, (2005) A comparison of two citrate anticoagulation regimens for continuous veno-venous hemofiltration. International Journal of Artificial Organs 28: 1211-1218

87. Swartz R, Pasko D, O'Toole J, Starmann B, (2004) Improving the delivery of continuous renal replacement therapy using regional citrate anticoagulation. Clinical Nephrology 61: 134-143

88. Nakada TA, Hirasawa H, Oda S, Shiga H, Nakanishi K, Matsuda K, Nakamura M, Shima M, Watanabe M, (2004) Catheter-related infections in continuous hemodiafiltration in intensive care patients. Blood Purification 22: 416-422

89. Elhanan N, Skippen P, Nuthall G, Krahn G, Seear M, (2004) Citrate anticoagulation in pediatric continuous venovenous hemofiltration. Pediatric Nephrology 19: 208-212

90. Monchi M, Berghmans D, Ledoux D, Canivet JL, Dubois B, Damas P, (2004) Citrate vs. heparin for anticoagulation in continuous venovenous hemofiltration: a prospective randomized study. Intensive Care Medicine 30: 260-265

91. Cointault O, Kamar N, Bories P, Lavayssiere L, Angles O, Rostaing L, Genestal M, Durand D, (2004) Regional citrate anticoagulation in continuous venovenous haemodiafiltration using commercial solutions. Nephrology Dialysis Transplantation 19: 171-178

92. Baldwin I, Bellomo R, Koch B, (2004) Blood flow reductions during continuous renal replacement therapy and circuit life. Intensive Care Medicine 30: 2074-2079

93. Uchino S, Fealy N, Baldwin I, Morimatsu H, Bellomo R, (2003) Continuous is not continuous: the incidence and impact of circuit "down-time" on uraemic control during continuous veno-venous haemofiltration. Intensive Care Medicine 29: 575-578

94. Dorval M, Madore F, Courteau S, Leblanc M, (2003) A novel citrate anticoagulation regimen for continuous venovenous hemodiafiltration. Intensive Care Medicine 29: 1186-1189

95. Mitchell A, Daul AE, Beiderlinden M, Schafers RF, Heemann U, Kribben A, Peters J, Philipp T, Wenzel RR, (2003) A new system for regional citrate anticoagulation in continuous venovenous hemodialysis (CVVHD). Clinical Nephrology 59: 106-114

96. Tobe SW, Aujla P, Walele AA, Oliver MJ, Naimark DM, Perkins NJ, Beardsall M, (2003) A novel regional citrate anticoagulation protocol for CRRT using only commercially available solutions. Journal of Critical Care 18: 121-129

97. Biancofiore G, Esposito M, Bindi L, Stefanini A, Bisa M, Boldrini A, Consani G, Filipponi F, Mosca F, (2003) Regional filter heparinization for continuous veno-venous hemofiltration in liver transplant recipients. Minerva Anestesiologica 69: 527-534

98. Venkataraman R, Kellum JA, Palevsky P, (2002) Dosing patterns for continuous renal replacement therapy at a large academic medical center in the United States. Journal of Critical Care 17: 246-250

99. Fealy N, Baldwin I, Bellomo R, (2002) The Effect of Circuit "down-time" on Uraemic Control During Continuous Veno-venous Haemofiltration. Crit Care Resusc 4(4): 266-70

100. Baldwin I, Tan HK, Bridge N, Bellomo R, (2002) Possible strategies to prolong circuit life during hemofiltration: three controlled studies. Renal Failure 24: 839-848

101. Fealy N, Baldwin I, Bellomo R, (2002) The effect of circuit "down-time" on uraemic control during continuous veno-venous haemofiltration. Critical Care & Resuscitation 4: 266-270

102. Chadha V, Garg U, Warady BA, Alon US, (2002) Citrate clearance in children receiving continuous venovenous renal replacement therapy. Pediatric Nephrology 17: 819-824

103. Morimatsu H, Uchino S, Bellomo R, Ronco C, (2002) Continuous renal replacement therapy: does technique influence azotemic control? Renal Failure 24: 645-653

104. Kozek-Langenecker SA, Spiss CK, Gamsjager T, Domenig C, Zimpfer M, (2002) Anticoagulation with prostaglandins and unfractionated heparin during continuous venovenous haemofiltration: a randomized controlled trial. Wiener Klinische Wochenschrift 114: 96-101

105. Gabutti L, Marone C, Colucci G, Duchini F, Schonholzer C, (2002) Citrate anticoagulation in continuous venovenous hemodiafiltration: a metabolic challenge. Intensive Care Medicine 28: 1419-1425

106. Chadha V, Gar U, Warady BA, Alon US, (2002) Citrate Clearance in Children Receiving Continuous Venovenous Renal Replacement Therapy Pediatric Nephrology 17(10): 819-24

107. Hofmann RM, Maloney C, Ward DM, Becker BN, (2002) A novel method for regional citrate anticoagulation in continuous venovenous hemofiltration (CVVHF). Ren Fail 24: 325-335

108. Holt AW, Bierer P, Glover P, Plummer JL, Bersten AD, (2002) Conventional coagulation and thromboelastograph parameters and longevity of continuous renal replacement circuits. Intensive Care Medicine 28: 1649-1655

109. Baldwin I, Bellomo R, Koch B, (2002) A Technique for the Monitoring of Blood Flow During Continuous Haemofiltration Intensive Care Medicine 28(9): 1361-4

110. Vargas Hein O, von Heymann C, Lipps M, Ziemer S, Ronco C, Neumayer HH, Morgera S, Welte M, Kox WJ, Spies C, (2001) Hirudin versus heparin for anticoagulation in continuous renal replacement therapy. Intensive Care Medicine 27: 673-679

111. Tolwani AJ, Campbell RC, Schenk MB, Allon M, Warnock DG, (2001) Simplified citrate anticoagulation for continuous renal replacement therapy. Kidney International 60: 370-374

112. Gilbert RW, (2000) Blood flow rate effects in continuous venovenous hemodiafiltration on blood urea nitrogen and creatinine reduction. Nephrology Nursing Journal 27: 503

113. Kutsogiannis DJ, Mayers I, Chin WD, Gibney RT, (2000) Regional citrate anticoagulation in continuous venovenous hemodiafiltration. American Journal of Kidney Diseases 35: 802-811

114. Baldwin I, Tan HK, Bridge N, Bellomo R, (2000) A prospective study of thromboelastography (TEG) and filter life during continuous veno-venous hemofiltration. Renal Failure 22: 297-306

115. Bellomo R, Farmer M, Bhonagiri S, Porceddu S, Ariens M, M'Pisi D, Ronco C, (1999) Changing acute renal failure treatment from intermittent hemodialysis to continuous hemofiltration: impact on azotemic control. International Journal of Artificial Organs 22: 145-150

116. Brunet S, Leblanc M, Geadah D, Parent D, Courteau S, Cardinal J, (1999) Diffusive and convective solute clearances during continuous renal replacement therapy at various dialysate and ultrafiltration flow rates. American Journal of Kidney Diseases 34: 486-492

117. Reeves JH, Cumming AR, Gallagher L, O'Brien JL, Santamaria JD, (1999) A controlled trial of low-molecular-weight heparin (dalteparin) versus unfractionated heparin as anticoagulant during continuous venovenous hemodialysis with filtration. Critical Care Medicine 27: 2224-2228

118. Brocklehurst IC, Thomas AN, Kishen R, Guy JM, (1996) Creatinine and urea clearance during continuous veno-venous haemofiltration in critically ill patients. Anaesthesia 51: 551-553

119. Holt AW, Bierer P, Bersten AD, Bury LK, Vedig AE, (1996) Continuous renal replacement therapy in critically ill patients: monitoring circuit function. Anaesthesia & Intensive Care 24: 423-429

120. Leslie GD, Jacobs IG, Clarke GM, (1996) Proximally delivered dilute heparin does not improve circuit life in continuous venovenous haemodiafiltration. Intensive Care Medicine 22: 1261-1264

121. Bellomo R, Farmer M, Parkin G, Wright C, Boyce N, (1995) Severe acute renal failure: a comparison of acute continuous hemodiafiltration and conventional dialytic therapy. Nephron 71: 59-64

122. Bellomo R, Farmer M, Parkin G, Wright C, Boyce N, (1995) Severe Acute Renal Failure: A Comparison of Acute Continuous Hemodiafiltration and Conventional Dialytic Therapy. Nephro 71(1): 59-64

123. Bellomo R, Farmer M, Boyce N, (1994) A prospective study of continuous hemodiafiltration in the management of severe acute renal failure in critically ill surgical patients. Renal Failure 16: 759-766

124. Freebairn RC, Lipman J, (1994) Continuous Venovenous Hemodiafiltration -- An Audit Demonstrating Control of Electrolytes with Haemodynamic Stability in the Critically Ill. South African Journal of Surgery 32(2): 77-82

125. Alamartine E, de Fillipis JP, Toulon J, Berthoux F, (1994) On-line Continuous Hemodiafiltration: A Technique for the Control of Ultrafiltration and Convection During Continuous Replacement Therapy. Renal Failure 16(6) 707-714

126. Frankenfield DC, Reynolds HN, Wiles CE, 3rd, Badellino MM, Siegel JH, (1994) Urea removal during continuous hemodiafiltration. Critical Care Medicine 22: 407-412

127. Bellomo R, Farmer M, Boyce N, (1994) Combined acute respiratory and renal failure: management by continuous hemodiafiltration. Resuscitation 28: 123-131

128. Bellomo R, Parkin G, Boyce N, (1993) Acute Renal Failure in the Critically Ill: Management by Continuous Veno-venous Hemodiafiltration. Journal of Critical Care 8(3):140-44

129. Bellomo R, Parkin G, Boyce N, (1993) Acute renal failure in the critically ill: management by continuous veno-venous hemodiafiltration. Journal of Critical Care 8: 140-144

130. Bellomo R, Teede H, Boyce N, (1993) Anticoagulant regimens in acute continuous hemodiafiltration: a comparative study. Intensive Care Medicine 19: 329-332

131. Bellomo R, Parkin G, Love J, Boyce N, (1992) Management of acute renal failure in the critically ill with continuous venovenous hemodiafiltration. Renal Failure 14: 183-186

132. Clark WR, Murphy MH, Alaka KJ, Mueller BA, Pastan SO, Macias WL, (1992) Urea kinetics during continuous hemofiltration. ASAIO Journal 38: Jul-Sep

133. Bellomo R, Parkin G, Love J, Boyce N, (1992) Use of continuous haemodiafiltration: an approach to the management of acute renal failure in the critically ill. American Journal of Nephrology 12: 240-245
